# Supplementary material for: Comparing induced point-dipoles and Drude oscillators
Source: Royal Society of Chemistry journal article supplement (doi:10.1039/c4cp04512b), 2014-11-19
Supplement: c4cp04512b1.pdf [file c4cp04512b1.pdf]

## Supplementary Material

| CHARMM model | $\oplus$ translation |          |           | $\ominus$ translation |          |           | $\oplus$ rotation |         |              | $\ominus$ rotation |         |              |
|--------------|----------------------|----------|-----------|-----------------------|----------|-----------|-------------------|---------|--------------|--------------------|---------|--------------|
|              | $D$                  | $\tau_0$ | $t_{max}$ | $D$                   | $\tau_0$ | $t_{max}$ | $\tau$            | $\beta$ | $\tau_{avg}$ | $\tau$             | $\beta$ | $\tau_{avg}$ |
| nonpol       | 2.16                 | 318      | 215       | 0.72                  | 1400     | 1240      | 478               | 0.68    | 625          | 55.8               | 0.43    | 153          |
| no H, 0.1    | 2.26                 | 299      | 250       | 0.86                  | 955      | 1380      | 467               | 0.69    | 600          | 54.0               | 0.42    | 156          |
| no H, 0.2    | 2.49                 | 265      | 183       | 0.98                  | 727      | 1360      | 457               | 0.69    | 585          | 50.9               | 0.43    | 144          |
| no H, 0.3    | 2.76                 | 200      | 218       | 1.05                  | 854      | 1420      | 415               | 0.71    | 516          | 48.2               | 0.42    | 141          |
| no H, 0.4    | 2.93                 | 130      | 203       | 1.19                  | 650      | 878       | 424               | 0.70    | 534          | 48.1               | 0.41    | 149          |
| no H, 0.5    | 2.97                 | 222      | 163       | 1.29                  | 646      | 588       | 394               | 0.68    | 510          | 45.5               | 0.42    | 130          |
| no H, 0.6    | 3.21                 | 155      | 175       | 1.50                  | 463      | 633       | 389               | 0.70    | 493          | 44.9               | 0.42    | 133          |
| no H, 0.7    | 3.44                 | 111      | 120       | 1.64                  | 402      | 480       | 377               | 0.71    | 472          | 44.2               | 0.43    | 124          |
| no H, 0.8    | 3.39                 | 209      | 113       | 1.69                  | 496      | 425       | 348               | 0.71    | 434          | 42.9               | 0.43    | 121          |
| no H, 0.9    | 3.63                 | 234      | 105       | 1.99                  | 377      | 373       | 343               | 0.73    | 418          | 42.4               | 0.43    | 116          |
| no H, 1.0    | 4.08                 | 72.7     | 108       | 2.11                  | 305      | 303       | 331               | 0.71    | 412          | 40.6               | 0.43    | 114          |
| impl H, 0.1  | 2.40                 | 231      | 158       | 1.01                  | 684      | 1460      | 472               | 0.69    | 609          | 53.7               | 0.43    | 152          |
| impl H, 0.2  | 2.52                 | 259      | 275       | 0.94                  | 1030     | 635       | 427               | 0.69    | 547          | 50.2               | 0.43    | 140          |
| impl H, 0.3  | 2.77                 | 204      | 190       | 1.24                  | 599      | 605       | 408               | 0.71    | 510          | 45.8               | 0.42    | 133          |
| impl H, 0.4  | 3.00                 | 233      | 230       | 1.29                  | 689      | 670       | 398               | 0.70    | 503          | 43.6               | 0.42    | 129          |
| impl H, 0.5  | 3.51                 | 140      | 150       | 1.69                  | 354      | 900       | 361               | 0.71    | 448          | 40.8               | 0.42    | 117          |
| impl H, 0.6  | 3.46                 | 155      | 120       | 1.63                  | 537      | 320       | 354               | 0.71    | 443          | 39.9               | 0.43    | 111          |
| impl H, 0.7  | 3.88                 | 131      | 128       | 1.98                  | 352      | 800       | 328               | 0.71    | 410          | 37.6               | 0.42    | 107          |
| impl H, 0.8  | 4.15                 | 125      | 118       | 2.16                  | 395      | 610       | 304               | 0.73    | 369          | 35.9               | 0.43    | 100          |
| impl H, 0.9  | 4.23                 | 172      | 113       | 2.20                  | 452      | 168       | 285               | 0.74    | 345          | 33.6               | 0.43    | 92.4         |
| impl H, 1.0  | 5.49                 | 54.2     | 85.0      | 3.19                  | 193      | 125       | 259               | 0.74    | 314          | 31.7               | 0.44    | 82.7         |

TABLE S1. MSD and  $\langle \vec{\mu}(0) \cdot \vec{\mu}(t) \rangle / \langle \vec{\mu}(0)^2 \rangle$  fit parameters of all CHARMM simulations.  $D$  is given in units of  $10^{-11} \text{ m}^2 \text{ s}^{-1}$ ,  $\tau_0$ ,  $t_{max}$ ,  $\tau$  and  $\tau_{avg}$  in units of ps. The first column lists the polarisability model and the respective strength of polarisabilities.

| AMBER<br>model | $\oplus$ translation |          |           | $\ominus$ translation |          |           | $\oplus$ rotation |         |              | $\ominus$ rotation |         |              |
|----------------|----------------------|----------|-----------|-----------------------|----------|-----------|-------------------|---------|--------------|--------------------|---------|--------------|
|                | $D$                  | $\tau_0$ | $t_{max}$ | $D$                   | $\tau_0$ | $t_{max}$ | $\tau$            | $\beta$ | $\tau_{avg}$ | $\tau$             | $\beta$ | $\tau_{avg}$ |
| nonpol         | 2.24                 | 282      | 185       | 0.76                  | 1200     | 740       | 491               | 0.68    | 643          | 55.8               | 0.42    | 160          |
| no H, 0.1      | 2.62                 | 136      | 228       | 0.97                  | 809      | 763       | 449               | 0.70    | 568          | 52.8               | 0.42    | 150          |
| no H, 0.2      | 2.43                 | 302      | 178       | 0.98                  | 866      | 883       | 446               | 0.70    | 566          | 51.7               | 0.42    | 147          |
| no H, 0.3      | 2.63                 | 193      | 153       | 1.06                  | 754      | 440       | 446               | 0.69    | 575          | 52.2               | 0.42    | 148          |
| no H, 0.4      | 2.82                 | 221      | 220       | 1.19                  | 708      | 860       | 419               | 0.68    | 544          | 50.2               | 0.42    | 147          |
| no H, 0.5      | 3.01                 | 182      | 153       | 1.48                  | 382      | 618       | 403               | 0.72    | 499          | 48.9               | 0.43    | 139          |
| no H, 0.6      | 3.18                 | 183      | 170       | 1.51                  | 530      | 745       | 394               | 0.71    | 492          | 49.7               | 0.43    | 139          |
| no H, 0.7      | 3.49                 | 124      | 120       | 1.74                  | 378      | 213       | 388               | 0.72    | 478          | 49.7               | 0.43    | 139          |
| no H, 0.8      | 4.39                 | 85.6     | 113       | 2.45                  | 213      | 305       | 314               | 0.74    | 379          | 42.8               | 0.43    | 115          |
| no H, 0.9      | 4.34                 | 97.9     | 120       | 2.47                  | 225      | 143       | 328               | 0.74    | 394          | 47.6               | 0.44    | 123          |
| no H, 1.0      | 4.24                 | 114      | 123       | 2.43                  | 275      | 128       | 344               | 0.72    | 423          | 50.9               | 0.44    | 132          |
| impl H, 0.1    | 2.55                 | 232      | 253       | 1.02                  | 671      | 1440      | 450               | 0.69    | 577          | 51.0               | 0.43    | 144          |
| impl H, 0.2    | 2.56                 | 255      | 173       | 1.02                  | 865      | 1340      | 428               | 0.68    | 558          | 48.6               | 0.42    | 138          |
| impl H, 0.3    | 2.80                 | 221      | 160       | 1.26                  | 550      | 628       | 419               | 0.70    | 527          | 47.8               | 0.43    | 135          |
| impl H, 0.4    | 3.03                 | 185      | 143       | 1.38                  | 536      | 660       | 403               | 0.71    | 502          | 45.9               | 0.43    | 129          |
| impl H, 0.5    | 3.22                 | 153      | 175       | 1.51                  | 514      | 550       | 383               | 0.73    | 466          | 44.3               | 0.42    | 130          |
| impl H, 0.6    | 3.56                 | 175      | 135       | 1.95                  | 336      | 428       | 357               | 0.73    | 434          | 43.9               | 0.44    | 117          |
| impl H, 0.7    | 4.19                 | 121      | 133       | 2.35                  | 261      | 328       | 322               | 0.73    | 393          | 40.8               | 0.43    | 111          |
| impl H, 0.8    | 5.76                 | 80.7     | 78.0      | 3.58                  | 151      | 150       | 250               | 0.73    | 304          | 33.1               | 0.45    | 82.3         |
| impl H, 0.9    | 5.62                 | 145      | 75.0      | 3.55                  | 213      | 100       | 252               | 0.75    | 299          | 35.2               | 0.45    | 86.1         |
| impl H, 1.0    | 6.36                 | 66.5     | 78.0      | 4.21                  | 173      | 133       | 248               | 0.75    | 297          | 36.9               | 0.47    | 85.0         |
| expl H, 0.1    | 2.57                 | 205      | 201       | 1.05                  | 743      | 1720      | 447               | 0.70    | 569          | 50.5               | 0.43    | 140          |
| expl H, 0.2    | 2.76                 | 213      | 205       | 1.20                  | 634      | 910       | 409               | 0.69    | 522          | 45.7               | 0.43    | 127          |
| expl H, 0.3    | 3.13                 | 185      | 118       | 1.41                  | 568      | 478       | 379               | 0.72    | 464          | 42.5               | 0.44    | 113          |
| expl H, 0.4    | 3.58                 | 125      | 140       | 1.85                  | 326      | 355       | 348               | 0.72    | 431          | 39.9               | 0.44    | 104          |
| expl H, 0.5    | 4.00                 | 78.1     | 105       | 2.07                  | 304      | 340       | 335               | 0.72    | 412          | 38.0               | 0.44    | 101          |
| expl H, 0.6    | 4.26                 | 116      | 100       | 2.38                  | 301      | 253       | 314               | 0.73    | 380          | 36.0               | 0.44    | 94.0         |
| expl H, 0.7    | 4.82                 | 90.7     | 105       | 2.78                  | 221      | 408       | 288               | 0.72    | 353          | 34.6               | 0.45    | 86.3         |
| expl H, 0.8    | 5.97                 | 69.3     | 95.0      | 3.66                  | 161      | 163       | 237               | 0.75    | 283          | 29.0               | 0.46    | 68.7         |
| expl H, 0.9    | 6.03                 | 77.9     | 70.0      | 3.92                  | 186      | 125       | 243               | 0.76    | 288          | 31.7               | 0.47    | 72.7         |
| expl H, 1.0    | 6.29                 | 92.5     | 80.0      | 4.11                  | 199      | 68        | 242               | 0.76    | 284          | 33.1               | 0.47    | 76.0         |

TABLE S2. MSD and  $\langle \vec{\mu}(0) \cdot \vec{\mu}(t) \rangle / \langle \vec{\mu}(0)^2 \rangle$  fit parameters of all AMBER simulations.  $D$  is given in units of  $10^{-11} \text{ m}^2 \text{ s}^{-1}$ ,  $\tau_0$ ,  $t_{max}$ ,  $\tau$  and  $\tau_{avg}$  in units of ps. The first column lists the polarisability model and the respective strength of polarisabilities.

| CHARMM model | $\oplus\oplus$     |                         |                           | $\ominus\ominus$     |                           |                             | $\oplus\ominus$     |                          |                            |
|--------------|--------------------|-------------------------|---------------------------|----------------------|---------------------------|-----------------------------|---------------------|--------------------------|----------------------------|
|              | $D^{\oplus\oplus}$ | $\tau_0^{\oplus\oplus}$ | $D^{\oplus} + D^{\oplus}$ | $D^{\ominus\ominus}$ | $\tau_0^{\ominus\ominus}$ | $D^{\ominus} + D^{\ominus}$ | $D^{\oplus\ominus}$ | $\tau_0^{\oplus\ominus}$ | $D^{\oplus} + D^{\ominus}$ |
| nonpol       | 4.48               | 267                     | 4.33                      | 1.55                 | 1250                      | 1.43                        | 3.01                | 485                      | 2.88                       |
| no H, 0.1    | 4.79               | 218                     | 4.52                      | 1.75                 | 959                       | 1.73                        | 3.30                | 376                      | 3.12                       |
| no H, 0.2    | 5.13               | 270                     | 4.97                      | 1.98                 | 1010                      | 1.96                        | 3.60                | 429                      | 3.47                       |
| no H, 0.3    | 5.42               | 189                     | 5.52                      | 2.08                 | 867                       | 2.11                        | 3.74                | 356                      | 3.81                       |
| no H, 0.4    | 5.77               | 189                     | 5.86                      | 2.32                 | 841                       | 2.38                        | 4.05                | 349                      | 4.12                       |
| no H, 0.5    | 5.78               | 201                     | 5.94                      | 2.46                 | 623                       | 2.57                        | 4.12                | 318                      | 4.25                       |
| no H, 0.6    | 6.54               | 173                     | 6.41                      | 2.94                 | 502                       | 3.00                        | 4.73                | 269                      | 4.71                       |
| no H, 0.7    | 6.77               | 117                     | 6.88                      | 3.35                 | 307                       | 3.28                        | 5.07                | 174                      | 5.08                       |
| no H, 0.8    | 6.95               | 189                     | 6.79                      | 3.53                 | 397                       | 3.38                        | 5.24                | 256                      | 5.08                       |
| no H, 0.9    | 7.38               | 220                     | 7.26                      | 3.90                 | 442                       | 3.98                        | 5.63                | 296                      | 5.62                       |
| no H, 1.0    | 7.92               | 96.2                    | 8.17                      | 4.16                 | 284                       | 4.23                        | 6.05                | 155                      | 6.20                       |
| impl H, 0.1  | 4.70               | 383                     | 4.81                      | 2.06                 | 751                       | 2.02                        | 3.40                | 476                      | 3.41                       |
| impl H, 0.2  | 5.00               | 278                     | 5.03                      | 1.89                 | 1040                      | 1.88                        | 3.44                | 466                      | 3.46                       |
| impl H, 0.3  | 5.57               | 202                     | 5.54                      | 2.49                 | 590                       | 2.48                        | 4.04                | 309                      | 4.01                       |
| impl H, 0.4  | 6.03               | 225                     | 6.00                      | 2.59                 | 697                       | 2.58                        | 4.31                | 355                      | 4.29                       |
| impl H, 0.5  | 6.99               | 150                     | 7.01                      | 3.33                 | 329                       | 3.39                        | 5.15                | 207                      | 5.20                       |
| impl H, 0.6  | 6.83               | 234                     | 6.93                      | 3.24                 | 562                       | 3.26                        | 5.03                | 337                      | 5.09                       |
| impl H, 0.7  | 7.69               | 152                     | 7.77                      | 3.97                 | 362                       | 3.95                        | 5.83                | 221                      | 5.86                       |
| impl H, 0.8  | 8.41               | 62.4                    | 8.31                      | 4.36                 | 345                       | 4.32                        | 6.39                | 148                      | 6.31                       |
| impl H, 0.9  | 8.60               | 90.4                    | 8.45                      | 4.49                 | 334                       | 4.39                        | 6.55                | 168                      | 6.42                       |
| impl H, 1.0  | 11.2               | 33.0                    | 11.0                      | 6.44                 | 170                       | 6.39                        | 8.80                | 79.9                     | 8.68                       |

TABLE S3. Fit parameters for the pair displacement  $\langle[\vec{R}_{ij}(t) - \vec{R}_{ij}(0)]^2\rangle$  for all CHARMM simulations.  $D$  is given in units of  $10^{-11} \text{ m}^2 \text{ s}^{-1}$ ,  $\tau_0$  in units of ps. The parameters show that each pair diffusion coefficient is roughly the sum of the respective single-particle diffusion coefficients of the two species.

| AMBER<br>model | $\oplus\oplus$     |                         |                           | $\ominus\ominus$     |                           |                             | $\oplus\ominus$     |                         |                            |
|----------------|--------------------|-------------------------|---------------------------|----------------------|---------------------------|-----------------------------|---------------------|-------------------------|----------------------------|
|                | $D^{\oplus\oplus}$ | $\tau_0^{\oplus\oplus}$ | $D^{\oplus} + D^{\oplus}$ | $D^{\ominus\ominus}$ | $\tau_0^{\ominus\ominus}$ | $D^{\ominus} + D^{\ominus}$ | $D^{\oplus\ominus}$ | $\tau_{0\oplus\ominus}$ | $D^{\oplus} + D^{\ominus}$ |
| nonpol         | 4.32               | 311                     | 4.47                      | 1.38                 | 1450                      | 1.52                        | 2.85                | 2.99                    | 545                        |
| no H, 0.1      | 5.07               | 155                     | 5.25                      | 1.83                 | 1030                      | 1.94                        | 3.45                | 3.59                    | 353                        |
| no H, 0.2      | 4.71               | 241                     | 4.86                      | 1.80                 | 901                       | 1.97                        | 3.26                | 3.41                    | 401                        |
| no H, 0.3      | 5.09               | 219                     | 5.26                      | 2.08                 | 701                       | 2.12                        | 3.58                | 3.69                    | 348                        |
| no H, 0.4      | 5.59               | 182                     | 5.63                      | 2.30                 | 784                       | 2.38                        | 3.95                | 4.01                    | 338                        |
| no H, 0.5      | 5.92               | 229                     | 6.03                      | 2.96                 | 417                       | 2.97                        | 4.44                | 4.50                    | 288                        |
| no H, 0.6      | 6.45               | 177                     | 6.36                      | 3.00                 | 543                       | 3.01                        | 4.72                | 4.68                    | 285                        |
| no H, 0.7      | 6.98               | 96.8                    | 6.97                      | 3.34                 | 379                       | 3.48                        | 5.16                | 5.23                    | 183                        |
| no H, 0.8      | 8.73               | 85.2                    | 8.78                      | 4.85                 | 211                       | 4.90                        | 6.78                | 6.84                    | 130                        |
| no H, 0.9      | 8.48               | 124                     | 8.67                      | 4.79                 | 263                       | 4.94                        | 6.64                | 6.80                    | 171                        |
| no H, 1.0      | 8.29               | 118                     | 8.47                      | 4.69                 | 306                       | 4.86                        | 6.49                | 6.67                    | 182                        |
| impl H, 0.1    | 4.87               | 287                     | 5.11                      | 1.84                 | 928                       | 2.03                        | 3.35                | 3.57                    | 446                        |
| impl H, 0.2    | 5.00               | 281                     | 5.12                      | 1.91                 | 1070                      | 2.04                        | 3.45                | 3.58                    | 476                        |
| impl H, 0.3    | 5.44               | 259                     | 5.60                      | 2.43                 | 604                       | 2.52                        | 3.93                | 4.06                    | 362                        |
| impl H, 0.4    | 5.71               | 185                     | 6.05                      | 2.60                 | 563                       | 2.77                        | 4.16                | 4.41                    | 295                        |
| impl H, 0.5    | 6.20               | 159                     | 6.44                      | 3.03                 | 452                       | 3.02                        | 4.62                | 4.73                    | 249                        |
| impl H, 0.6    | 7.01               | 164                     | 7.13                      | 3.88                 | 272                       | 3.89                        | 5.44                | 5.51                    | 203                        |
| impl H, 0.7    | 8.07               | 123                     | 8.39                      | 4.45                 | 286                       | 4.69                        | 6.26                | 6.54                    | 179                        |
| impl H, 0.8    | 11.3               | 97.5                    | 11.5                      | 6.75                 | 199                       | 7.16                        | 9.00                | 9.34                    | 134                        |
| impl H, 0.9    | 11.1               | 144                     | 11.3                      | 7.02                 | 176                       | 7.10                        | 9.04                | 9.17                    | 158                        |
| impl H, 1.0    | 12.9               | 65.0                    | 12.7                      | 8.56                 | 169                       | 8.42                        | 10.7                | 10.6                    | 106                        |
| expl H, 0.1    | 4.76               | 329                     | 5.14                      | 1.86                 | 942                       | 2.11                        | 3.32                | 3.62                    | 485                        |
| expl H, 0.2    | 5.63               | 198                     | 5.53                      | 2.41                 | 651                       | 2.39                        | 4.02                | 3.96                    | 324                        |
| expl H, 0.3    | 6.32               | 175                     | 6.26                      | 2.70                 | 661                       | 2.82                        | 4.50                | 4.54                    | 309                        |
| expl H, 0.4    | 7.10               | 172                     | 7.15                      | 3.60                 | 351                       | 3.70                        | 5.34                | 5.43                    | 230                        |
| expl H, 0.5    | 7.85               | 86.1                    | 8.00                      | 4.03                 | 307                       | 4.13                        | 5.94                | 6.07                    | 155                        |
| expl H, 0.6    | 8.30               | 120                     | 8.53                      | 4.64                 | 330                       | 4.75                        | 6.46                | 6.64                    | 192                        |
| expl H, 0.7    | 9.21               | 106                     | 9.65                      | 5.43                 | 243                       | 5.56                        | 7.31                | 7.60                    | 156                        |
| expl H, 0.8    | 11.9               | 76.1                    | 12.0                      | 7.18                 | 170                       | 7.31                        | 9.50                | 9.63                    | 111                        |
| expl H, 0.9    | 12.3               | 42.9                    | 12.1                      | 7.95                 | 135                       | 7.84                        | 10.1                | 9.95                    | 78.2                       |
| expl H, 1.0    | 12.3               | 113                     | 12.6                      | 8.22                 | 187                       | 8.22                        | 10.3                | 10.4                    | 141                        |

TABLE S4. Fit parameters for the pair displacement  $\langle [\vec{R}_{ij}(t) - \vec{R}_{ij}(0)]^2 \rangle$  for all AMBER simulations.  $D$  is given in units of  $10^{-11} \text{ m}^2 \text{ s}^{-1}$ ,  $\tau_0$  in units of ps. The parameters show that each pair diffusion coefficient is roughly the sum of the respective single-particle diffusion coefficients of the two species.

| CHARMM $\oplus\oplus$ |                      |        |         |       | $\ominus\ominus$ |                      |       |          |          | $\oplus\ominus$ |       |              |                      |        |         |       |              |
|-----------------------|----------------------|--------|---------|-------|------------------|----------------------|-------|----------|----------|-----------------|-------|--------------|----------------------|--------|---------|-------|--------------|
| model                 | $\langle CN \rangle$ | $\tau$ | $\beta$ | $a_0$ | $\tau_{avg}$     | $\langle CN \rangle$ | $a_1$ | $\tau_1$ | $\tau_2$ | $\beta$         | $a_0$ | $\tau_{avg}$ | $\langle CN \rangle$ | $\tau$ | $\beta$ | $a_0$ | $\tau_{avg}$ |
| nonpol                | 10.1                 | 3350   | 0.57    | 0.00  | 5450             | 4.11                 | 1.45  | 9.97     | 5760     | 0.47            | 0.00  | 8490         | 7.05                 | 5410   | 0.77    | 0.45  | 6310         |
| no H, 0.1             | 10.1                 | 3290   | 0.57    | 0.00  | 5370             | 4.12                 | 1.45  | 10.0     | 5240     | 0.49            | 0.00  | 7190         | 7.07                 | 5330   | 0.78    | 0.40  | 6140         |
| no H, 0.2             | 10.1                 | 2930   | 0.57    | 0.01  | 4750             | 4.12                 | 1.45  | 10.0     | 4680     | 0.50            | 0.00  | 6070         | 7.21                 | 4960   | 0.77    | 0.32  | 5780         |
| no H, 0.3             | 10.1                 | 2660   | 0.57    | 0.04  | 4290             | 4.11                 | 1.46  | 10.0     | 4260     | 0.49            | 0.00  | 5620         | 7.32                 | 4570   | 0.76    | 0.24  | 5380         |
| no H, 0.4             | 10.1                 | 2480   | 0.57    | 0.10  | 3980             | 4.10                 | 1.45  | 10.3     | 4090     | 0.51            | 0.00  | 5150         | 7.11                 | 4290   | 0.79    | 0.40  | 4920         |
| no H, 0.5             | 10.1                 | 2320   | 0.57    | 0.13  | 3790             | 4.09                 | 1.46  | 10.4     | 3740     | 0.51            | 0.00  | 4700         | 7.33                 | 4160   | 0.75    | 0.27  | 4960         |
| no H, 0.6             | 10.0                 | 2160   | 0.57    | 0.15  | 3490             | 4.09                 | 1.30  | 10.3     | 2780     | 0.48            | 0.00  | 4060         | 7.40                 | 3850   | 0.74    | 0.28  | 4630         |
| no H, 0.7             | 10.0                 | 2070   | 0.58    | 0.11  | 3270             | 4.08                 | 1.34  | 10.9     | 2600     | 0.50            | 0.03  | 3510         | 7.24                 | 3560   | 0.79    | 0.32  | 4070         |
| no H, 0.8             | 9.97                 | 1930   | 0.56    | 0.12  | 3170             | 4.07                 | 1.43  | 12.1     | 2810     | 0.52            | 0.00  | 3400         | 7.27                 | 3330   | 0.77    | 0.34  | 3890         |
| no H, 0.9             | 9.96                 | 1900   | 0.56    | 0.09  | 3160             | 4.06                 | 1.18  | 9.16     | 2000     | 0.48            | 0.01  | 3040         | 7.29                 | 3090   | 0.75    | 0.38  | 3660         |
| no H, 1.0             | 9.94                 | 1730   | 0.57    | 0.15  | 2770             | 4.04                 | 1.42  | 12.5     | 2390     | 0.53            | 0.00  | 2840         | 7.34                 | 2980   | 0.76    | 0.32  | 3490         |
| impl H, 0.1           | 10.1                 | 3071   | 0.58    | 0.00  | 4836             | 4.12                 | 1.37  | 10.3     | 4342     | 0.47            | 0.00  | 6446         | 7.40                 | 5433   | 0.78    | 0.08  | 6288         |
| impl H, 0.2           | 10.1                 | 2888   | 0.59    | 0.00  | 4466             | 4.12                 | 1.36  | 10.1     | 4452     | 0.45            | 0.00  | 7258         | 7.53                 | 5507   | 0.75    | 0.00  | 6580         |
| impl H, 0.3           | 10.1                 | 2645   | 0.58    | 0.00  | 4202             | 4.12                 | 1.39  | 10.3     | 3743     | 0.48            | 0.00  | 5452         | 6.99                 | 4064   | 0.79    | 0.54  | 4659         |
| impl H, 0.4           | 10.0                 | 2469   | 0.56    | 0.00  | 4107             | 4.12                 | 1.40  | 10.3     | 3391     | 0.50            | 0.00  | 4497         | 7.67                 | 4444   | 0.71    | 0.00  | 5526         |
| impl H, 0.5           | 10.0                 | 2214   | 0.57    | 0.00  | 3577             | 4.12                 | 1.37  | 10.4     | 3065     | 0.49            | 0.00  | 4329         | 7.64                 | 3967   | 0.73    | 0.00  | 4812         |
| impl H, 0.6           | 9.99                 | 2132   | 0.56    | 0.00  | 3507             | 4.10                 | 1.41  | 11.1     | 2749     | 0.51            | 0.00  | 3445         | 7.36                 | 3414   | 0.75    | 0.30  | 4078         |
| impl H, 0.7           | 9.96                 | 1944   | 0.56    | 0.00  | 3202             | 4.11                 | 1.41  | 11.3     | 2429     | 0.53            | 0.00  | 2934         | 7.14                 | 2978   | 0.78    | 0.47  | 3437         |
| impl H, 0.8           | 9.93                 | 1790   | 0.56    | 0.00  | 2972             | 4.11                 | 1.40  | 11.6     | 2191     | 0.53            | 0.00  | 2598         | 7.27                 | 2779   | 0.77    | 0.37  | 3239         |
| impl H, 0.9           | 9.90                 | 1644   | 0.55    | 0.04  | 2774             | 4.09                 | 1.41  | 11.7     | 2083     | 0.53            | 0.00  | 2489         | 7.38                 | 2639   | 0.74    | 0.33  | 3172         |
| impl H, 1.0           | 9.87                 | 1250   | 0.57    | 0.20  | 2005             | 4.10                 | 1.28  | 9.81     | 1377     | 0.53            | 0.03  | 1718         | 7.59                 | 2196   | 0.74    | 0.21  | 2647         |

TABLE S5. Fit parameters for the cage relaxation function  $\langle n(0)n(t) \rangle$  for all CHARMM simulations.  $\langle CN \rangle$  is the average number of particles of particles in the first solvation shell and  $a_0$  is the steady-state value this function is approaching in the asymptotic limit.  $\tau$  and  $\tau_{avg}$  are given in units of ps.  $\tau_{avg}$  describes the mean residence time of a particle in the first solvation shell of another particle.

| AMBER model | $\oplus\oplus$       |        |         |       |              | $\ominus\ominus$     |       |          |          |         | $\oplus\ominus$ |              |                      |        |         |       |              |
|-------------|----------------------|--------|---------|-------|--------------|----------------------|-------|----------|----------|---------|-----------------|--------------|----------------------|--------|---------|-------|--------------|
|             | $\langle CN \rangle$ | $\tau$ | $\beta$ | $a_0$ | $\tau_{avg}$ | $\langle CN \rangle$ | $a_1$ | $\tau_1$ | $\tau_2$ | $\beta$ | $a_0$           | $\tau_{avg}$ | $\langle CN \rangle$ | $\tau$ | $\beta$ | $a_0$ | $\tau_{avg}$ |
| nonpol      | 10.2                 | 3140   | 0.57    | 0.14  | 5130         | 4.10                 | 1.49  | 9.59     | 6190     | 0.49    | a0              | 8200         | 7.28                 | 5750   | 0.74    | 0.28  | 6920         |
| no H, 0.1   | 10.1                 | 3060   | 0.57    | 0.00  | 4890         | 4.08                 | 1.45  | 10.1     | 4920     | 0.49    | 0.00            | 6710         | 7.30                 | 5080   | 0.75    | 0.28  | 6060         |
| no H, 0.2   | 10.1                 | 2800   | 0.56    | 0.13  | 4680         | 4.08                 | 1.46  | 10.2     | 4730     | 0.49    | 0.00            | 6260         | 7.16                 | 5030   | 0.76    | 0.35  | 5910         |
| no H, 0.3   | 10.1                 | 2520   | 0.58    | 0.21  | 3990         | 4.06                 | 1.48  | 10.6     | 4580     | 0.49    | 0.00            | 6030         | 7.23                 | 4640   | 0.76    | 0.35  | 5460         |
| no H, 0.4   | 10.1                 | 2460   | 0.57    | 0.11  | 3930         | 4.05                 | 1.46  | 11.0     | 3960     | 0.51    | 0.00            | 4890         | 7.33                 | 4350   | 0.75    | 0.27  | 5150         |
| no H, 0.5   | 10.0                 | 2390   | 0.57    | 0.09  | 3880         | 4.04                 | 1.33  | 11.6     | 3010     | 0.49    | 0.00            | 4200         | 7.43                 | 4140   | 0.73    | 0.24  | 5030         |
| no H, 0.6   | 10.0                 | 2190   | 0.57    | 0.13  | 3560         | 4.02                 | 1.45  | 12.2     | 3260     | 0.51    | 0.02            | 4020         | 7.45                 | 3890   | 0.73    | 0.23  | 4720         |
| no H, 0.7   | 9.99                 | 2020   | 0.57    | 0.17  | 3260         | 4.00                 | 1.32  | 13.8     | 2640     | 0.49    | 0.00            | 3660         | 7.33                 | 3520   | 0.76    | 0.33  | 4160         |
| no H, 0.8   | 9.95                 | 1600   | 0.58    | 0.17  | 2530         | 4.00                 | 1.24  | 11.2     | 1870     | 0.50    | 0.00            | 2580         | 7.48                 | 2830   | 0.75    | 0.22  | 3360         |
| no H, 0.9   | 9.92                 | 1630   | 0.57    | 0.15  | 2640         | 3.98                 | 1.26  | 10.0     | 1690     | 0.52    | 0.00            | 2150         | 7.34                 | 2780   | 0.77    | 0.32  | 3230         |
| no H, 1.0   | 9.90                 | 1600   | 0.57    | 0.20  | 2610         | 3.96                 | 1.09  | 8.31     | 1490     | 0.49    | 0.06            | 2270         | 7.54                 | 2800   | 0.74    | 0.24  | 3380         |
| impl H, 0.1 | 10.1                 | 2900   | 0.56    | 0.04  | 4740         | 4.09                 | 1.46  | 10.0     | 4770     | 0.48    | 0.04            | 6610         | 7.21                 | 4890   | 0.76    | 0.33  | 5760         |
| impl H, 0.2 | 10.1                 | 2650   | 0.56    | 0.14  | 4370         | 4.09                 | 1.46  | 9.99     | 4440     | 0.49    | 0.00            | 5840         | 7.11                 | 4650   | 0.76    | 0.43  | 5460         |
| impl H, 0.3 | 10.1                 | 2660   | 0.55    | 0.02  | 4520         | 4.08                 | 1.46  | 10.6     | 3850     | 0.50    | 0.00            | 4940         | 7.23                 | 4360   | 0.76    | 0.34  | 5120         |
| impl H, 0.4 | 10.1                 | 2350   | 0.56    | 0.10  | 3930         | 4.07                 | 1.44  | 10.7     | 3570     | 0.51    | 0.00            | 4400         | 7.30                 | 4090   | 0.75    | 0.31  | 4880         |
| impl H, 0.5 | 10.0                 | 2240   | 0.57    | 0.11  | 3640         | 4.06                 | 1.44  | 11.2     | 3260     | 0.52    | 0.00            | 3970         | 7.23                 | 3850   | 0.78    | 0.32  | 4420         |
| impl H, 0.6 | 9.98                 | 1920   | 0.57    | 0.13  | 3110         | 4.06                 | 1.34  | 10.7     | 2100     | 0.51    | 0.00            | 2710         | 7.38                 | 3330   | 0.76    | 0.25  | 3900         |
| impl H, 0.7 | 9.94                 | 1680   | 0.56    | 0.12  | 2740         | 4.06                 | 1.31  | 10.5     | 1820     | 0.51    | 0.06            | 2350         | 7.53                 | 2910   | 0.73    | 0.21  | 3530         |
| impl H, 0.8 | 9.90                 | 1190   | 0.58    | 0.16  | 1890         | 4.05                 | 1.20  | 8.88     | 1170     | 0.51    | 0.05            | 1610         | 7.60                 | 2060   | 0.73    | 0.20  | 2500         |
| impl H, 0.9 | 9.86                 | 1150   | 0.56    | 0.19  | 1880         | 4.05                 | 1.09  | 7.93     | 1080     | 0.49    | 0.04            | 1640         | 7.67                 | 1970   | 0.71    | 0.21  | 2450         |
| impl H, 1.0 | 9.81                 | 1060   | 0.57    | 0.18  | 1700         | 4.04                 | 0.93  | 3.00     | 850      | 0.48    | 0.03            | 1410         | 7.76                 | 1790   | 0.71    | 0.17  | 2220         |
| expl H, 0.1 | 10.1                 | 2780   | 0.57    | 0.12  | 4490         | 4.10                 | 1.47  | 10.0     | 4620     | 0.49    | 0.02            | 6280         | 7.18                 | 4760   | 0.77    | 0.36  | 5560         |
| expl H, 0.2 | 10.1                 | 2720   | 0.56    | 0.01  | 4480         | 4.10                 | 1.45  | 10.3     | 4070     | 0.51    | 0.00            | 5140         | 7.42                 | 4640   | 0.74    | 0.19  | 5600         |
| expl H, 0.3 | 10.0                 | 2290   | 0.56    | 0.08  | 3740         | 4.11                 | 1.46  | 10.5     | 3440     | 0.51    | 0.00            | 4260         | 7.32                 | 3890   | 0.75    | 0.31  | 4630         |
| expl H, 0.4 | 10.0                 | 1960   | 0.57    | 0.16  | 3150         | 4.11                 | 1.45  | 11.0     | 2860     | 0.52    | 0.00            | 3480         | 7.25                 | 3460   | 0.78    | 0.33  | 4000         |
| expl H, 0.5 | 9.97                 | 1870   | 0.57    | 0.09  | 3020         | 4.11                 | 1.29  | 10.7     | 2140     | 0.50    | 0.00            | 2990         | 7.45                 | 3170   | 0.75    | 0.25  | 3790         |
| expl H, 0.6 | 9.93                 | 1620   | 0.57    | 0.16  | 2590         | 4.12                 | 1.19  | 9.58     | 1820     | 0.49    | 0.02            | 2720         | 7.41                 | 2820   | 0.76    | 0.29  | 3330         |
| expl H, 0.7 | 9.88                 | 1400   | 0.57    | 0.19  | 2260         | 4.12                 | 1.14  | 9.07     | 1520     | 0.48    | 0.00            | 2360         | 7.51                 | 2500   | 0.75    | 0.23  | 2980         |
| expl H, 0.8 | 9.83                 | 1150   | 0.57    | 0.14  | 1880         | 4.13                 | 1.22  | 9.73     | 1180     | 0.52    | 0.01            | 1580         | 7.67                 | 1970   | 0.72    | 0.20  | 2420         |
| expl H, 0.9 | 9.79                 | 1110   | 0.57    | 0.16  | 1800         | 4.13                 | 1.09  | 8.01     | 1010     | 0.50    | 0.03            | 1490         | 7.71                 | 1930   | 0.72    | 0.18  | 2380         |
| expl H, 1.0 | 9.73                 | 1040   | 0.56    | 0.16  | 1720         | 4.14                 | 0.96  | 7.01     | 920      | 0.49    | 0.03            | 1490         | 7.80                 | 1780   | 0.71    | 0.19  | 2240         |

TABLE S6. Fit parameters for the cage relaxation function  $\langle n(0)n(t) \rangle$  for all AMBER simulations.  $\langle CN \rangle$  is the average number of particles of particles in the first solvation shell and  $a_0$  is the steady-state value this function is approaching in the asymptotic limit.  $\tau$  and  $\tau_{avg}$  are given in units of ps.  $\tau_{avg}$  describes the mean residence time of a particle in the first solvation shell of another particle.
